# Supplementary material for: STAT3 Inhibition Attenuates MYC Expression by Modulating Co-Activator Recruitment and Suppresses Medulloblastoma Tumor Growth by Augmenting Cisplatin Efficacy In Vivo
Source: MDPI journal article supplement (doi:10.3390/cancers15082239), 2023-04-11
Supplement: s1 [file s1]

## **Supplement Figures/legends**

**Fig. S1-S13**

Fig. S1

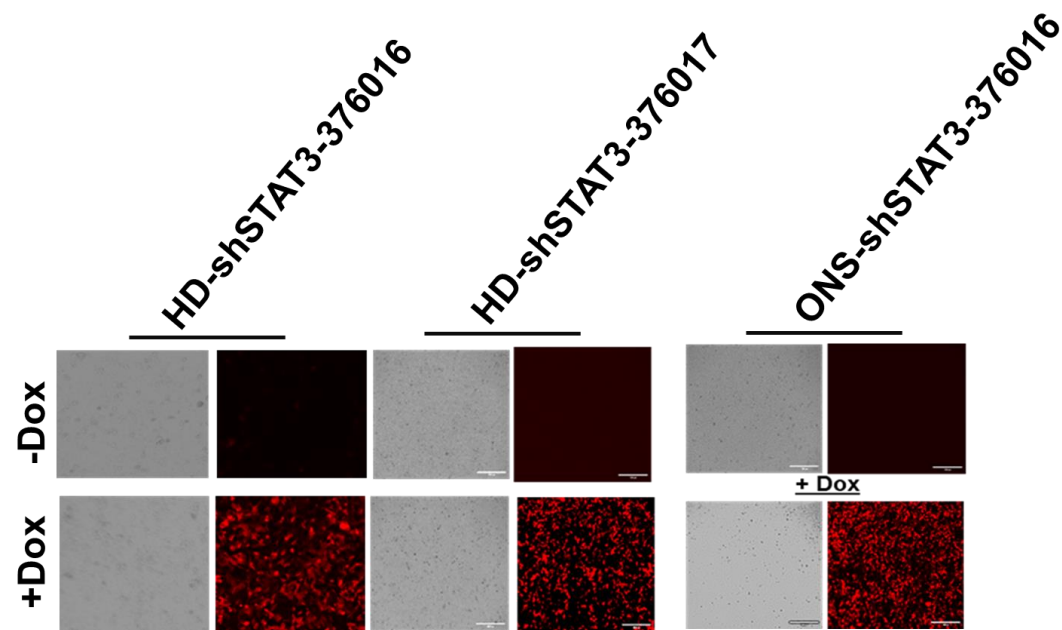

**Figure S1:** Expression of red fluorescence protein (RFP) in HD-shSTAT3 (shRNA-ID-376016 and 376017) and ONS-shSTAT3 (shRNA-ID-376016) cells after 24 h of Dox treatment.

Fig. S2

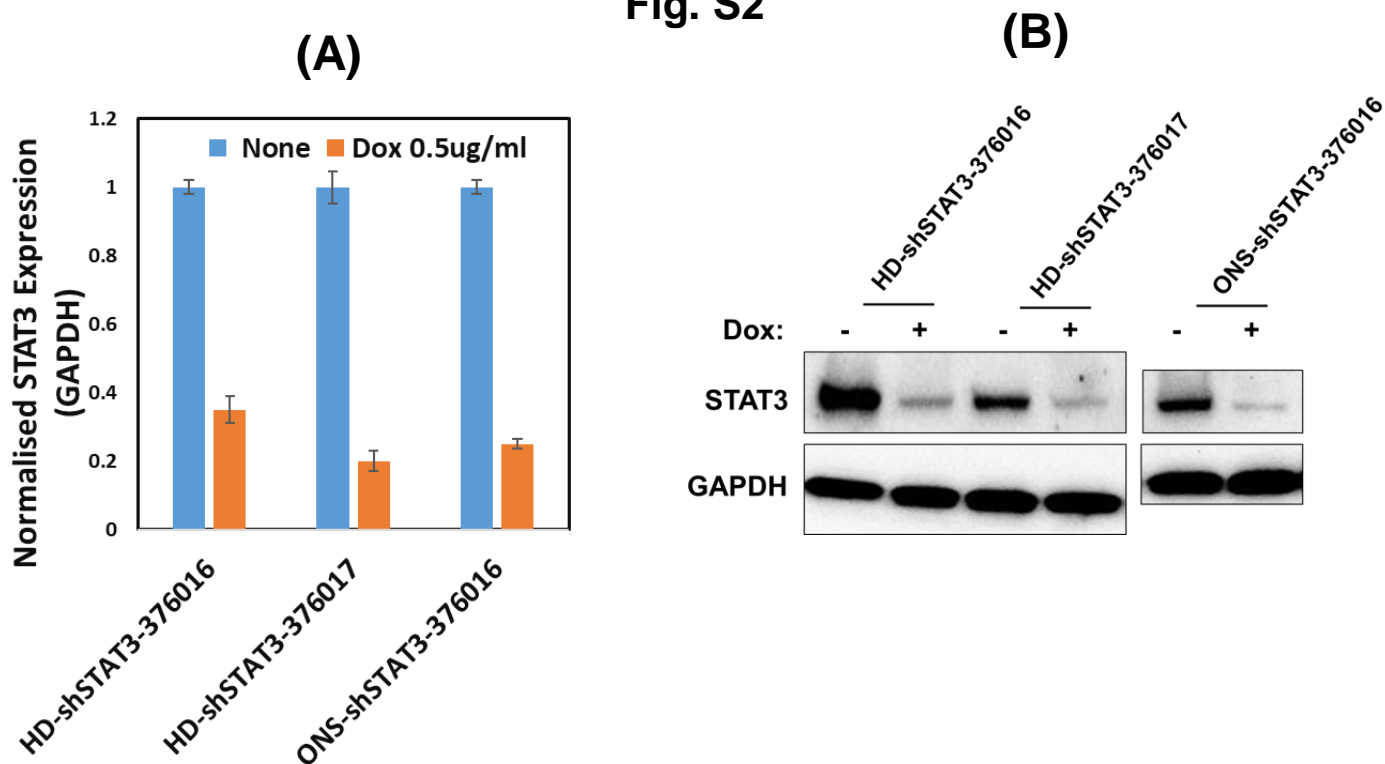

**Figure S2:** Expression of STAT3 mRNA in HD-shSTAT3 (shRNA-ID-376016 and 376017) and ONS-shSTAT3 (shRNA-ID-376016) cells with 0.5 ug/ml Dox treatments are shown by qPCR (A) and Western Blot (B).

**Fig. S3**

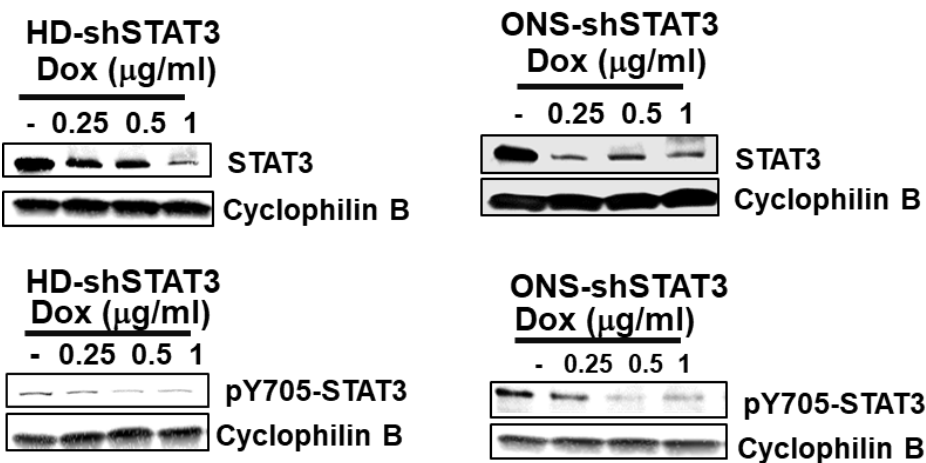

**Figure S3:** Expression of STAT3 and pY705-STAT3 levels in HD-shSTAT3 and ONS-shSTAT3 cells after Dox treatment for 48 h.

**Fig. S4**

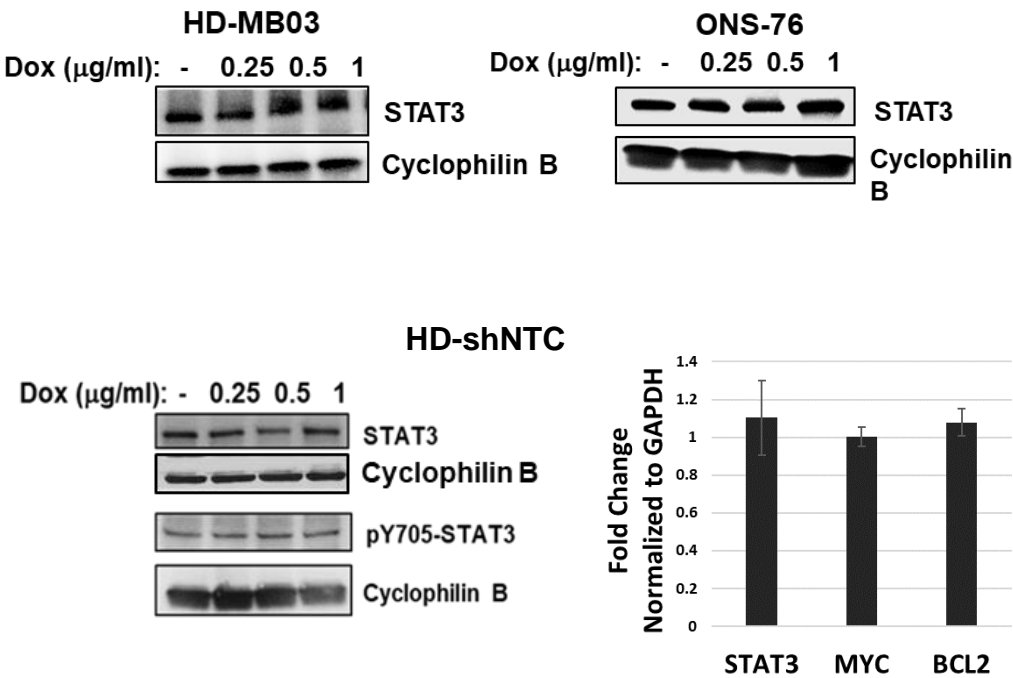

**Figure S4: Top:** Expression of STAT3 levels in parental HD-MB03 and ONS76 cells after Dox treatment for 48 h.

**Bottom:** Left: Expression of STAT3 and pY705-STAT3 levels in HD-MB03 shRNA-Non-targeting cells (HD-shNTC) after Dox treatment for 48 h. Right: Gene expression of STAT3, MYC and BCL2 in HD-shNTC cells with Dox treatment for 48 h. Fold change normalized to GAPDH.

Fig. S5

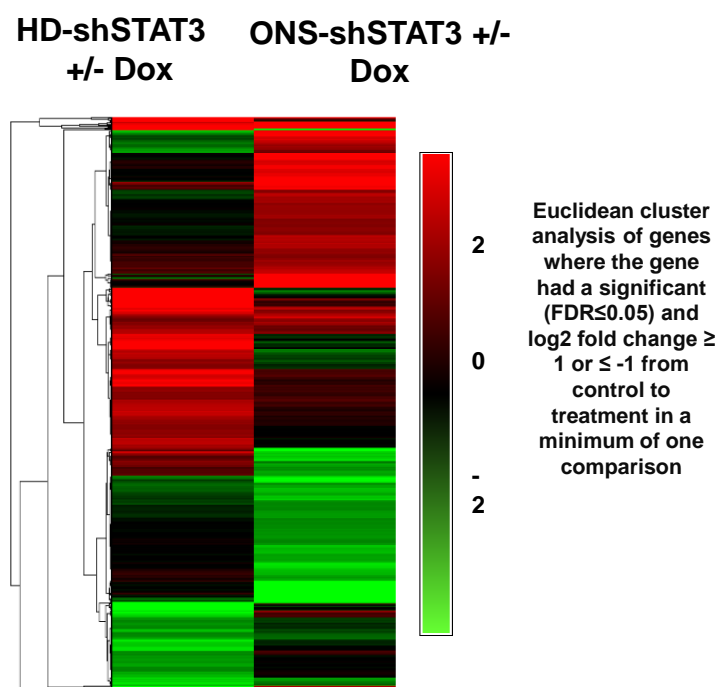

Figure S5. Heat map showing significantly upregulated/downregulated genes from RNA Seq analysis of HD-shSTAT3 and ONS-shSTAT3 cells after STAT3 KD.

Fig. S6  
GSEA analysis of HD-shSTAT3

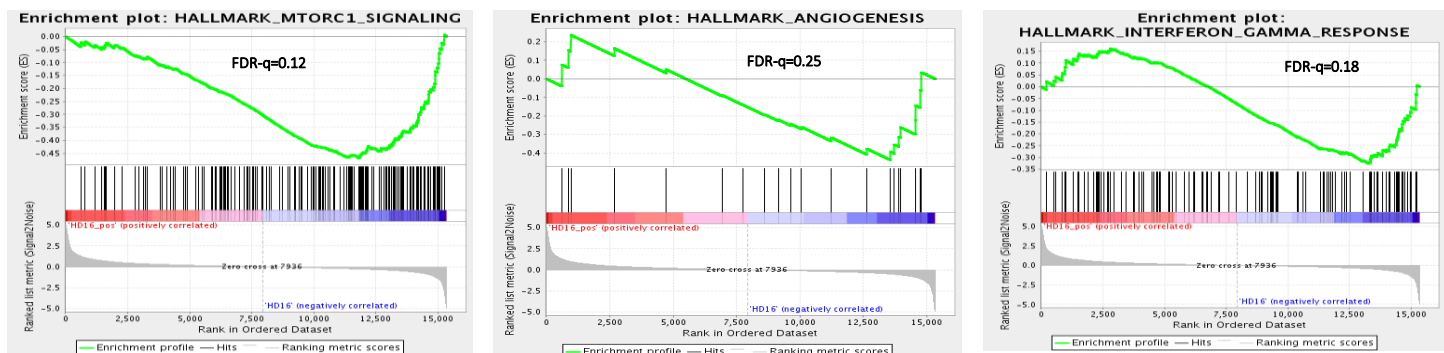

GSEA analysis of ONS-shSTAT3

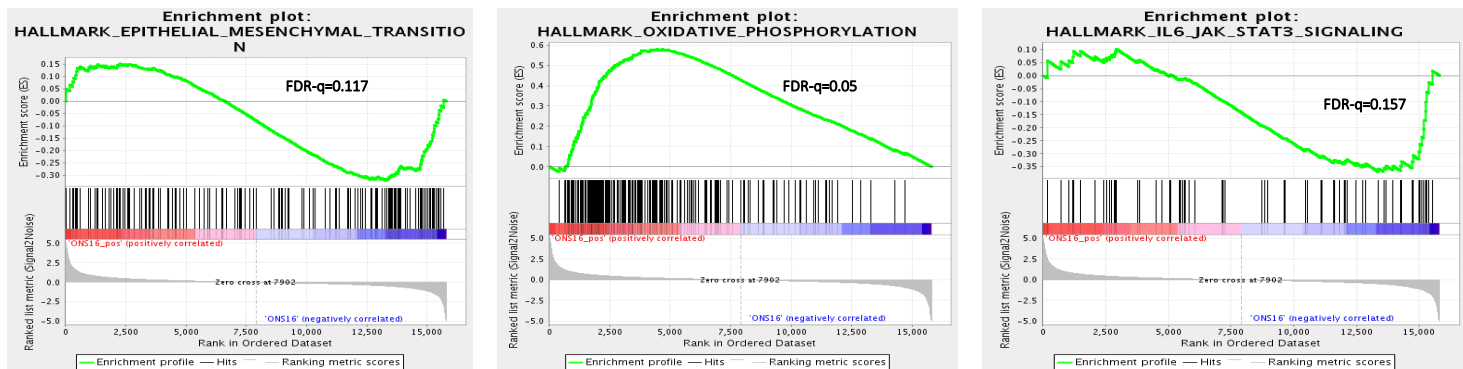

Figure S6: GSE analysis for the changes in STAT3 target gene sets after STAT3 KD. FDR  $q < 0.25$  considered significant.

**Fig. S7**

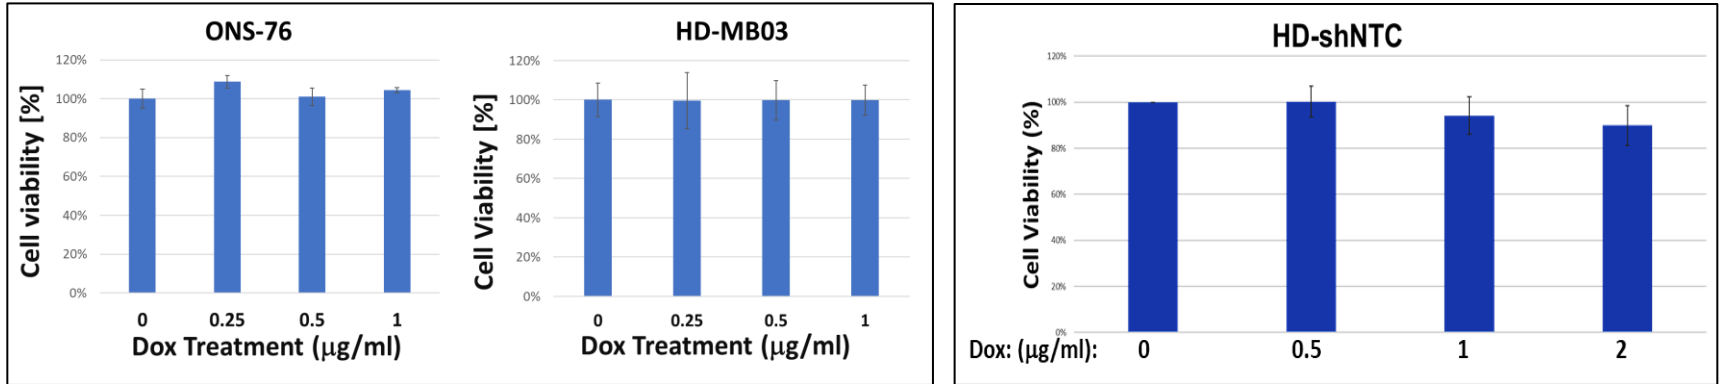

**Figure S7:** The growth of parental HD-MB03 and ONS76 cells and HD-Non targeting shRNA control cells (HD-shNTC) after Dox treatment for 48 h were determined using MTT assays.

**Fig. S8**

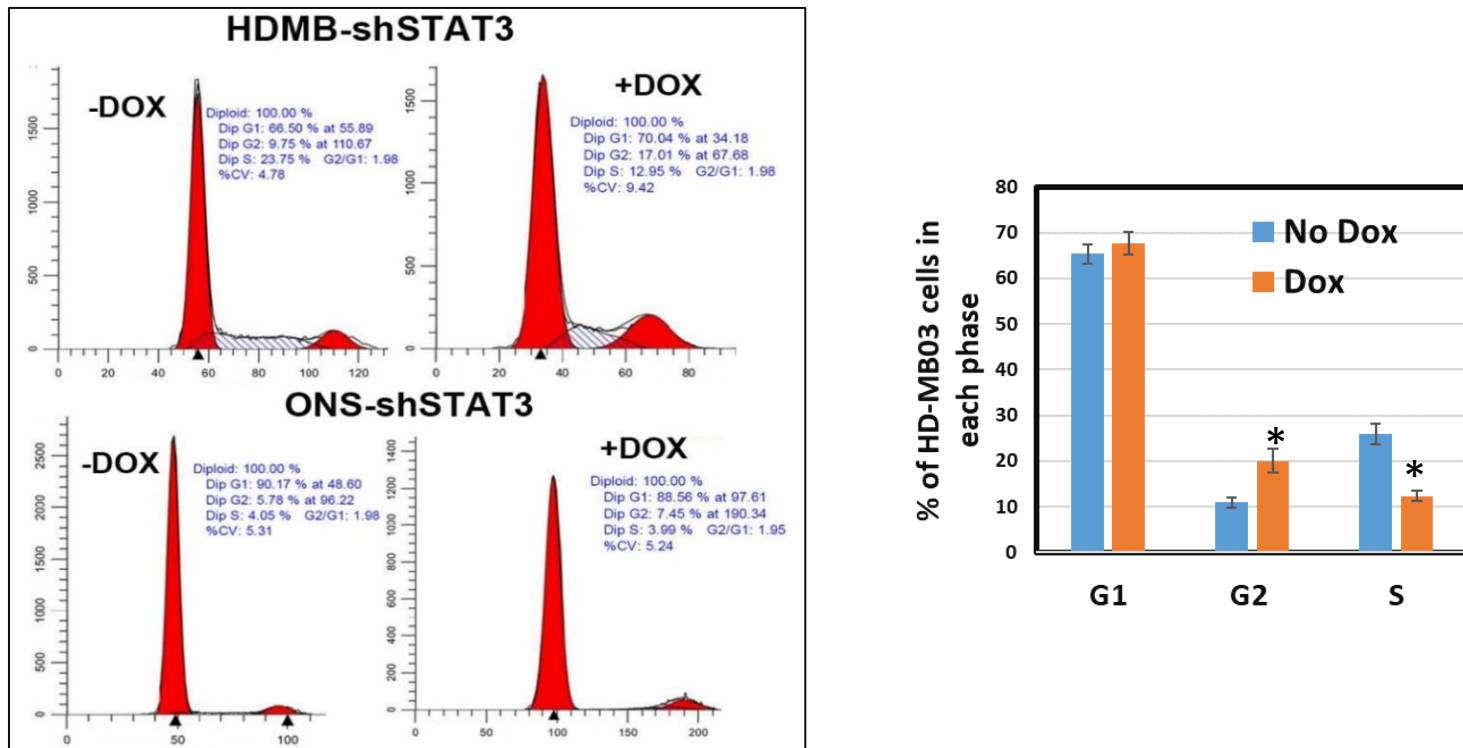

**Figure S8:** Left: Representative Cell cycle analysis plot using Propidium-iodide (PI) staining of HD-shSTAT3 and ONS-shSTAT3 cells after STAT3 KD. Right: Bar graph represent mean $\pm$ SD and are based on three independent experiments. Statistical significance was determined using Student's t-test ( $p < 0.05$ )



**Fig. S9**

**ONS-shSTAT3**

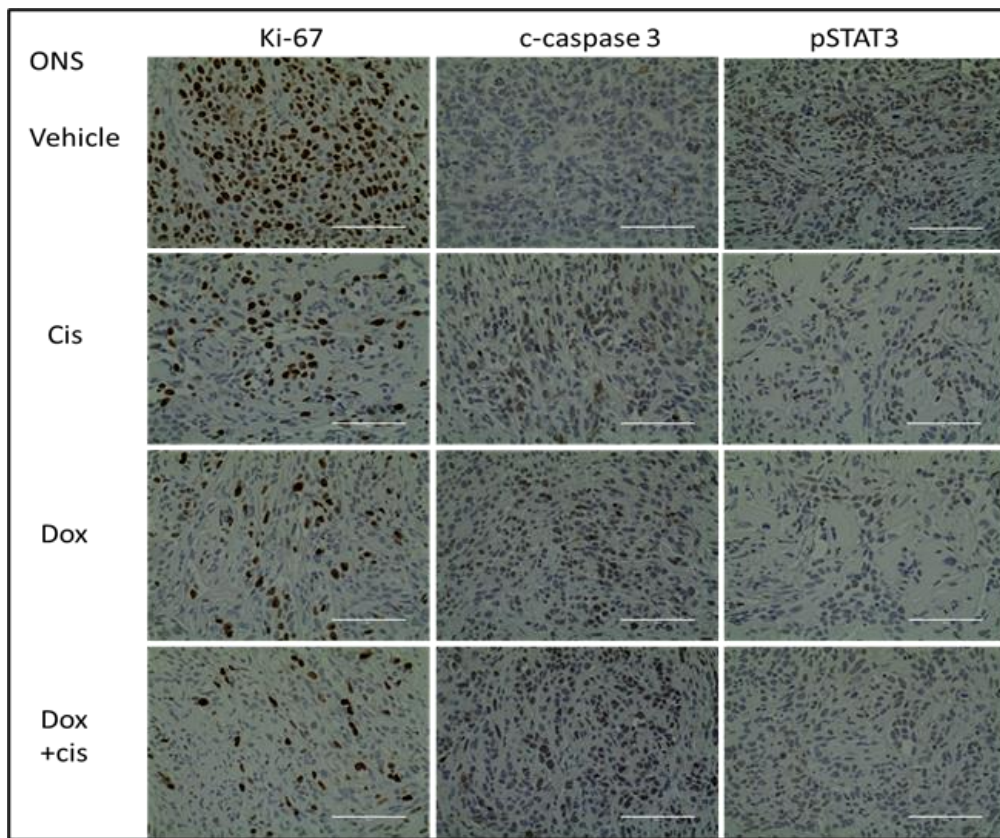

**Figure S9:** Representative IHC images (20X) of the ONS-shSTAT3 xenograft sections of Ki-67, caspase-3, and pSTAT3 are shown.

**Fig. S10**

**HD-shSTAT3**

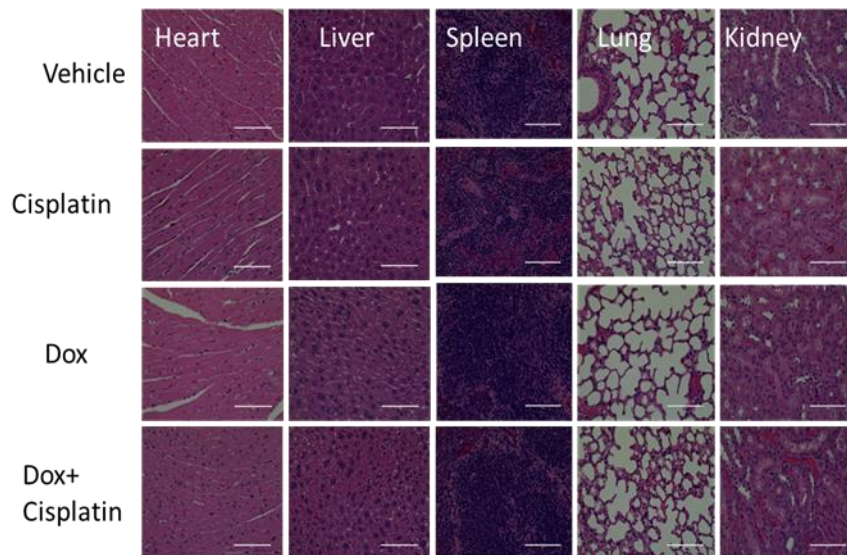

**ONS-shSTAT3**

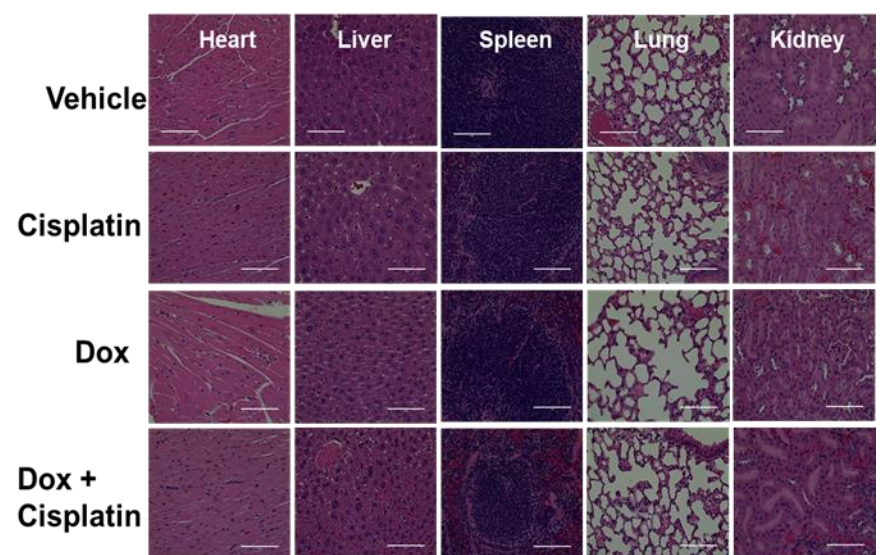

**Figure S10:** H&E staining of heart, lung, liver, kidney and spleen of HD-shSTAT3 and ONS-shSTAT3 xenograft sections showing no sign of toxicity after completion of the treatment.

Fig. S11

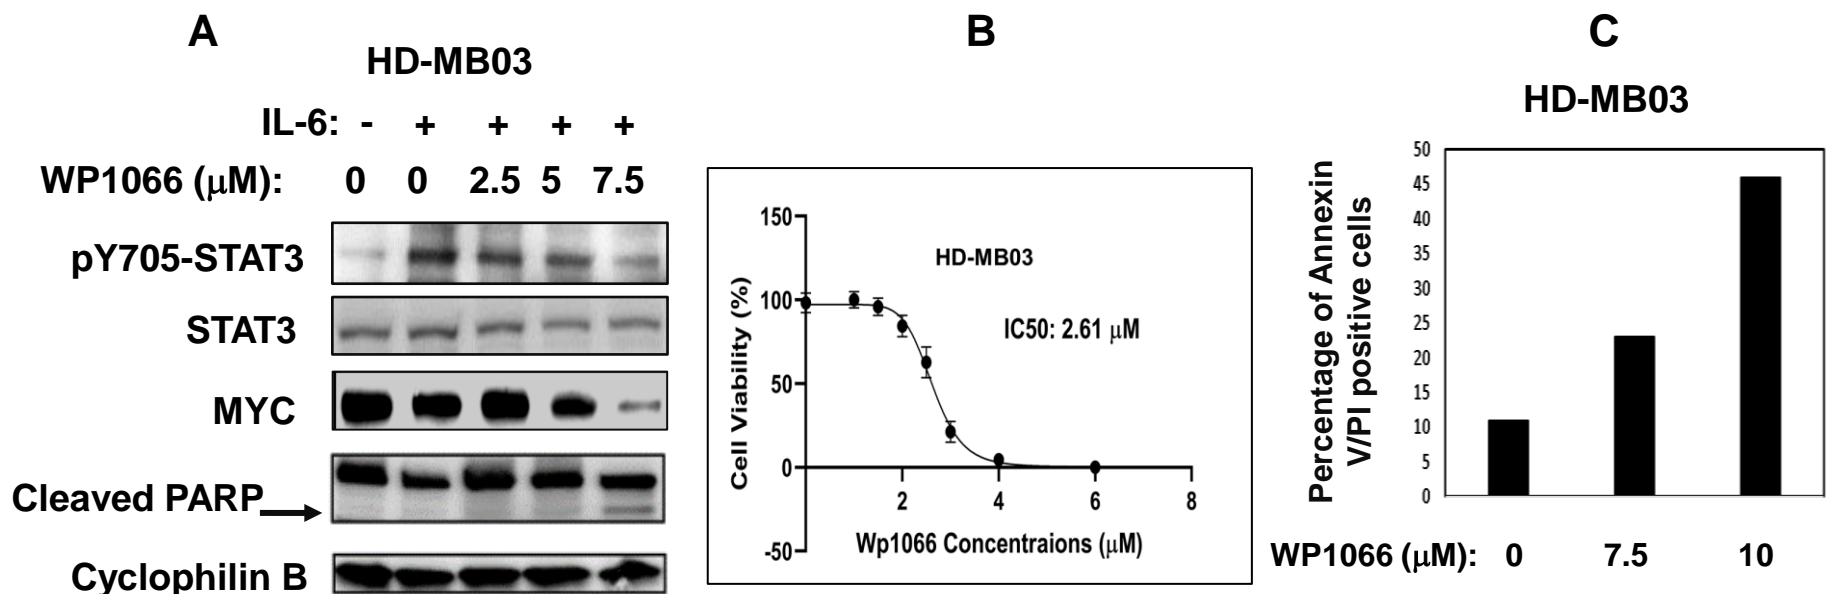

**Figure S11:** (A) HD-MB03 cells were treated with increasing dose of WP1066 for 6 hours and cells were stimulated with IL-6 for 20 minutes before harvesting cells. Western immunoblot was performed with WCE and expression levels of pY705-STAT3, total STAT3, MYC and cleaved PARP were shown. (B) HD-MB03 cells were treated with indicated doses of WP1066 and MTT assay was performed to determine MB cell viability. (C) HD-MB03 cells were treated with indicated doses of WP1066 and annexin V staining was done. Representative bar graph shows percentage of apoptotic cell death after treatments.

Fig. S12

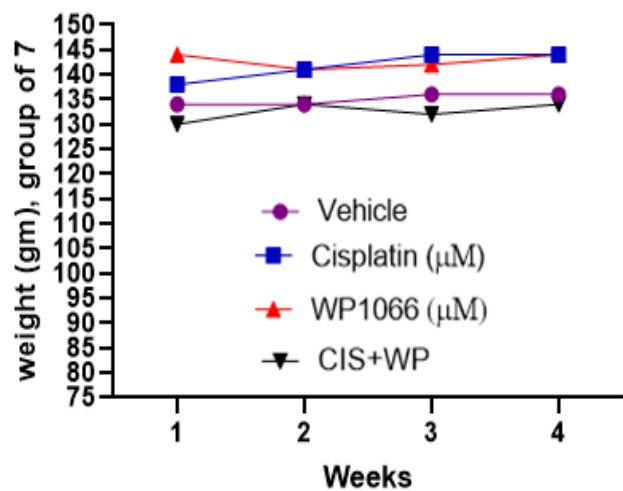

Fig. S13

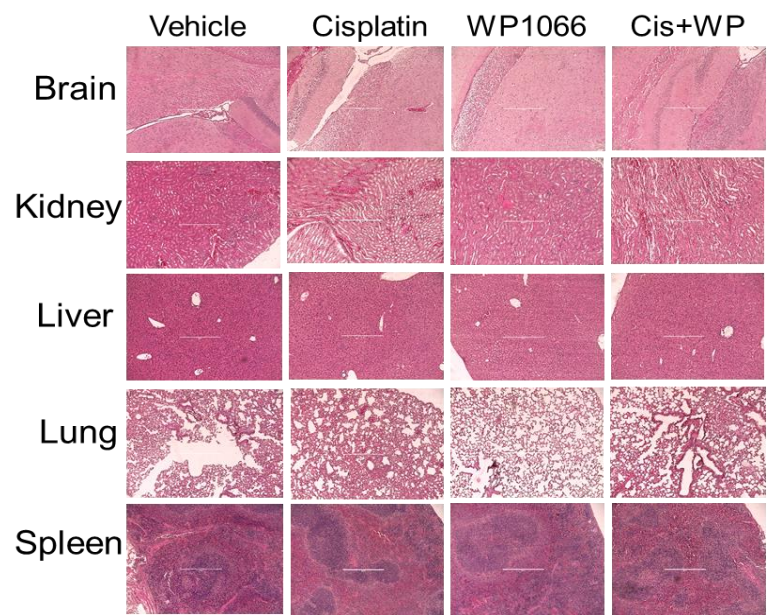

**Figure S12** shows the line graph of the mean body weight of mice following treatment. **Figure S13** shows the histopathology (H&E) of the vital organs of MB xenografts following 4 weeks post treatment with inhibitors. The images were scanned and captured using digital scanner EVOS Image system at 20x magnification.
